# Supplementary material
Source: publisher figshare collection journal article supplement (https://acs.figshare.com/ndownloader/files/17387486)
Supplement: Supplementary file 1 [file 17387486]

## **DNA Structural Alteration Leading to Antibacterial Properties of 6-Nitroquinoxaline Derivatives**

Khondakar Sayef Ahammed,<sup>†,§</sup> Ritesh Pal,<sup>†,‡,§</sup> Jeet Chakraborty,<sup>†,§</sup> Ajay Kanungo,<sup>†,‡</sup> Polnati Sravani Purnima,<sup>†</sup> Sanjay Dutta <sup>\*,†,‡</sup>

<sup>†</sup> Organic and Medicinal Chemistry Division, CSIR- Indian Institute of Chemical Biology

4, Raja S.C. Mullick Road, Kolkata-700032, West Bengal, India.

E-mail: sanjaydutta@iicb.res.in

<sup>‡</sup> Academy of Scientific and Innovative Research (AcSIR), Kolkata-700032, West Bengal, India.

<sup>§</sup> These authors contributed equally.

\* Corresponding author.

## Table of Contents

|                                                                                                                       |              |
|-----------------------------------------------------------------------------------------------------------------------|--------------|
| <b>Figure S1:</b> MIC value of compounds—                                                                             | Page S3      |
| <b>Figure S2:</b> Time-kill assay —                                                                                   | Page S3-S4   |
| <b>Figure S3:</b> Cellular morphology of HEK 293 cells with compound <b>3a</b> —                                      | Page S4      |
| <b>Figure S4:</b> Agarose gel shift assay of pCDNA3.1 plasmid with <b>3k</b> , <b>3m</b> , <b>3o</b> , <b>3j</b> —    | Page S5      |
| <b>Figure S5:</b> CD spectra of poly-AT DNA and poly-GC DNA with <b>3a</b> —                                          | Page S5      |
| <b>Figure S6:</b> CD spectra of mammalian genomic DNA with <b>3a</b> —                                                | Page S5      |
| <b>Figure S7:</b> FID-quenching plot of <i>S. aureus</i> genomic DNA with <b>3a</b> at different pH and temperature—  | Page S6      |
| <b>Figure S8:</b> FID-quenching plot of <i>S. aureus</i> genomic DNA with <b>3a</b> at different salt concentrations— | Page S6      |
| <b>Figure S9:</b> UV absorption spectra of compounds <b>3a</b> , <b>3q</b> , <b>3u</b> —                              | Page S7      |
| <b>Figure S10:</b> UV absorption spectra of <b>3d</b> —                                                               | Page S7      |
| <b>Figure S11:</b> EtBr fluorescence quenching with <b>3a</b> , <b>3q</b> , <b>3u</b> —                               | Page S8      |
| <b>Figure S12:</b> Isothermal titration calorimetry of CT-DNA with <b>3a</b> , <b>3q</b> , <b>3u</b> —                | Page S9-S10  |
| <b>Figure S13:</b> Statistical analysis of DNA condensation of <i>S. aureus</i> cells with <b>3a</b> —                | Page S11     |
| <b>Figure S14:</b> Disruption of preformed biofilm in <i>S. epidermidis</i> by <b>3a</b> —                            | Page S11     |
| <b>Supporting table 1:</b> Comparison table —                                                                         | Page S12     |
| <b>Supplementary References</b> —                                                                                     | Page S13-S14 |

---

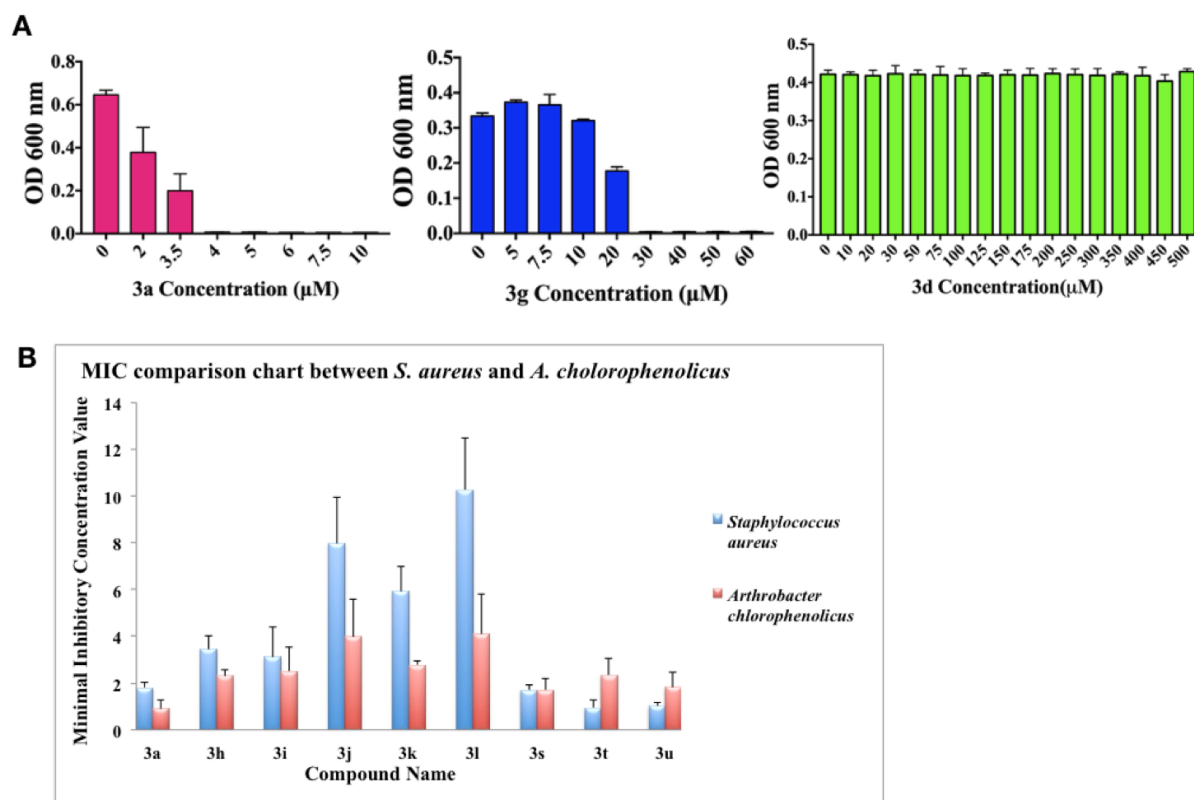

**Supporting Figure S1:**(A) MIC values of *S. aureus* cells treated with indicated compounds (**3a**, **3g**, **3d**) and incubated for 6 h at 37 °C.<sup>1, 2</sup> (B) Comparison of MIC values of para substituted derivatives (**3a**, **3h**, **3i**, **3j**, **3k**, **3l**) and disubstituted derivatives (**3s**, **3t**, **3u**) between *S. aureus* and *A. chlorophenolicus*.

### Time-kill assay:

Monitoring the rate of bacteriocidal or bacteriostatic activity in the presence of varying concentrations of the antimicrobial compounds is very crucial in determining the actual effect of the drug against a growing population of the bacterial cells.<sup>3</sup> In this study, the growth kinetics of *S. aureus* cells in the presence of designed compounds were evaluated by an *in-vitro* time-kill assay. Log phase *S. aureus* cells ( $3 \times 10^5$  cells/mL) were treated with **3a**, **3d**, **3u**, **3q** and kanamycin (as a positive control), incubated at 37 °C and OD was measured (at 600 nm) at 1.5 hours interval. Results indicate that the compounds **3a**, **3q** and **3u** were able to inhibit the growth of the bacterial cell at double-MIC concentrations while **3d** was unable to inhibit the growth of the cells (Figure S2).

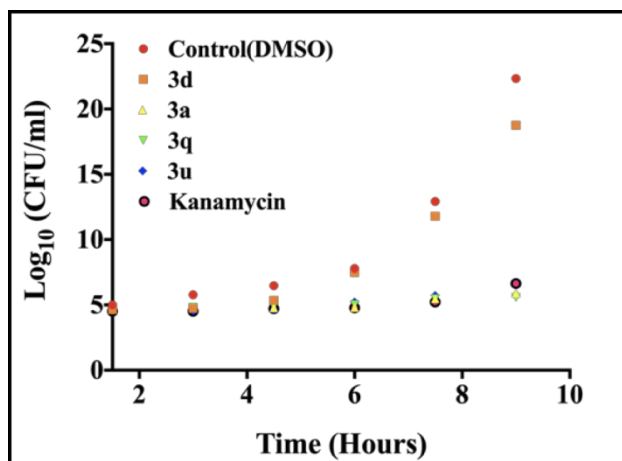

**Supporting Figure S2:** Time-kill kinetic study of the compounds (**3a**, **3d**, **3q**, **3u** and kanamycin) against *S. aureus*.  $3 \times 10^5$  cells were inoculated, treated with DMSO (0.5 %) or indicated compounds. Log CFU/mL was plotted against different time (hour).

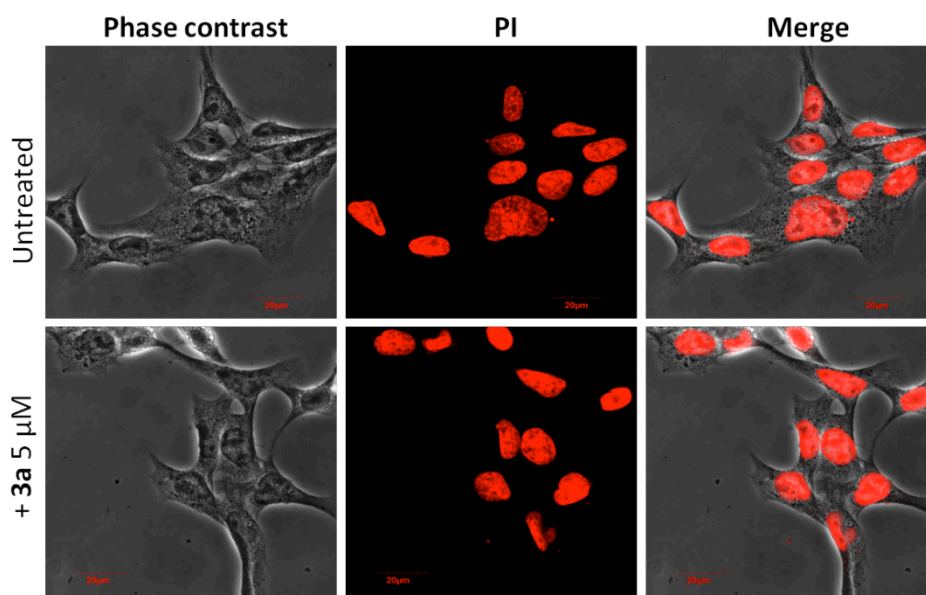

**Supporting Figure S3:** Cellular morphology of HEK 293 cells, untreated or treated with **3a**, stained with propidium iodide (PI, nuclear stain) cells were visualized in 60x magnification. Scale bar- 20  $\mu\text{m}$ .<sup>3</sup>

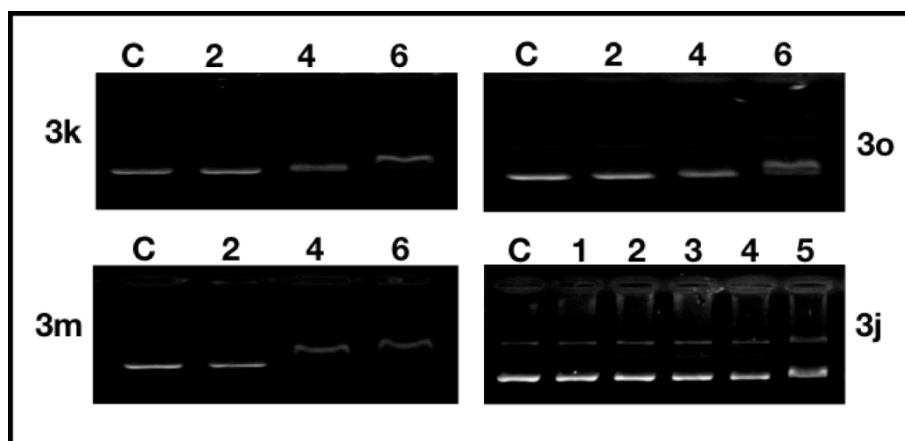

**Supporting Figure S4:** Agarose gel shift assay with **3k**, **3o**, **3m** and **3j**. Lane number indicates [compound]/[DNA base pair] ratios.<sup>4</sup>

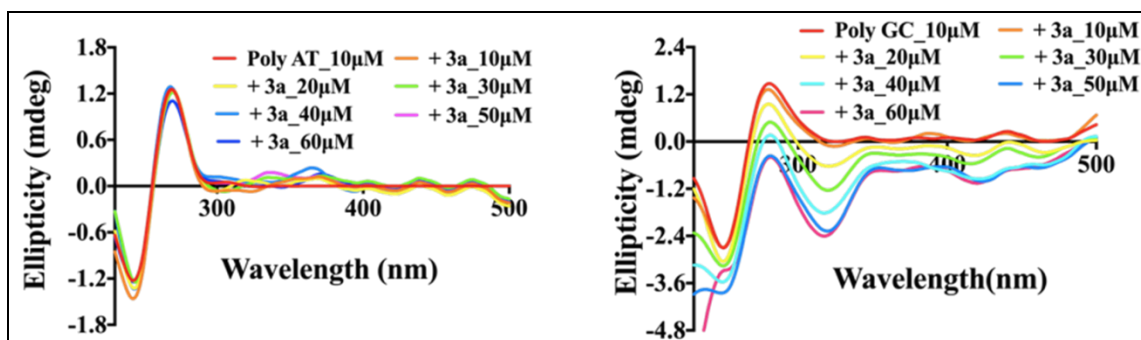

**Supporting Figure S5:** Circular dichroism (CD) spectra of 10  $\mu$ M poly-AT DNA (left) and poly-GC DNA (right) titrated with **3a** in an increasing concentrations from 10 to 60  $\mu$ M.<sup>4</sup>

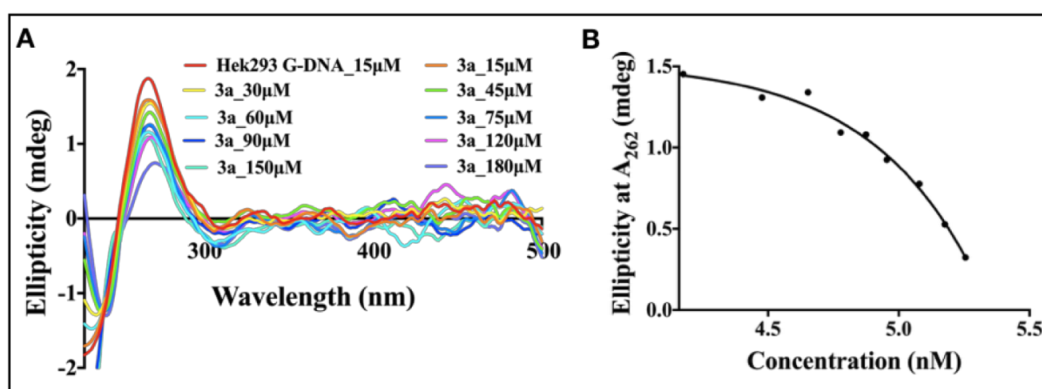

**Supporting Figure S6:** (A) Circular dichroism (CD) spectra of 15  $\mu$ M mammalian genomic DNA (isolated from HEK 293 cell line) titrated with **3a** in an increasing concentrations of 15, 30, 45, 60, 75, 90, 120, 150, 180  $\mu$ M. (B) Ellipticity plot at 262 nm bands of CD spectra.

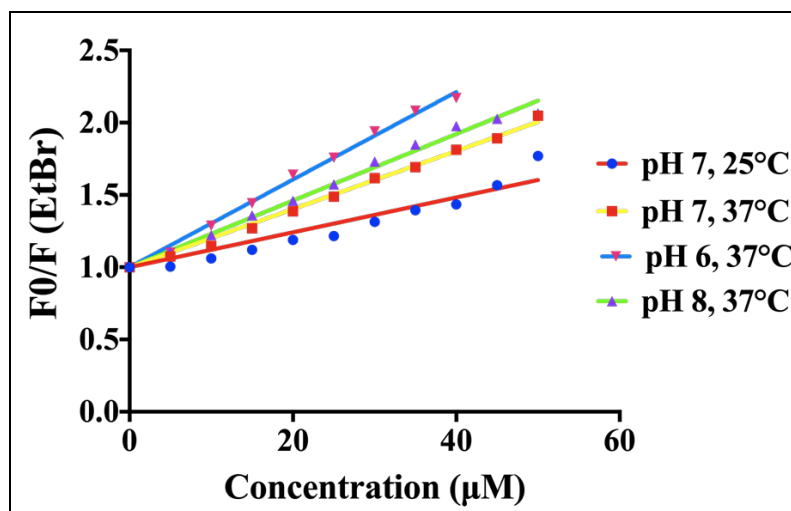

**Supporting Figure S7:** Quenching plot of fluorescence intercalator displacement assay (FID) with 10  $\mu\text{M}$  *S. aureus* genomic DNA and 5  $\mu\text{M}$  EtBr ( $\lambda_{\text{ex}} = 480 \text{ nm}$ ) titrated with **3a** (2.5-50  $\mu\text{M}$ ) at indicated pH and temperature.  $K_{\text{SV}}$  values at (pH 8, 37 °C is  $2.3 \times 10^4 \text{ M}^{-1}$ , pH 7, 37 °C is  $2.0 \times 10^4 \text{ M}^{-1}$ , pH 6, 37 °C is  $3.0 \times 10^4 \text{ M}^{-1}$ ).

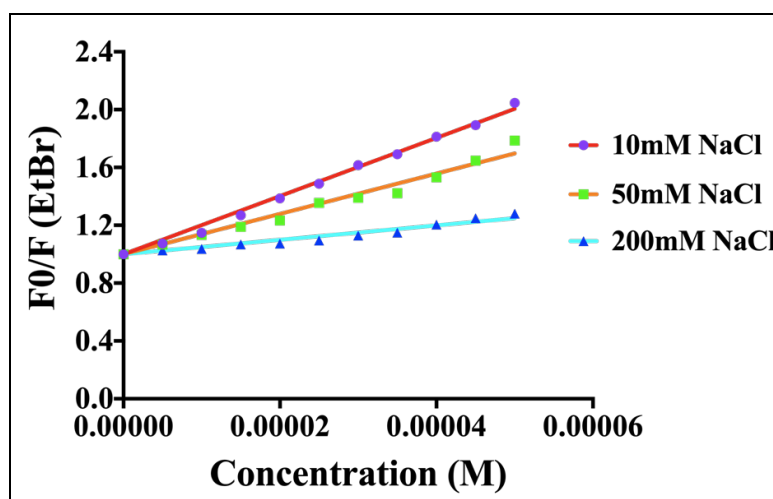

**Supporting Figure S8:** Quenching plot of fluorescence intercalator displacement assay (FID) with 10  $\mu\text{M}$  *S. aureus* genomic DNA and 5  $\mu\text{M}$  EtBr ( $\lambda_{\text{ex}} = 480 \text{ nm}$ ) with indicated salt concentration.

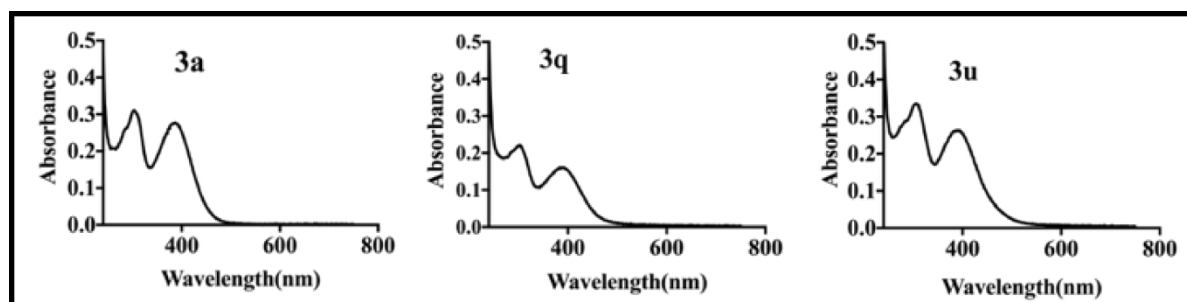

**Supporting Figure S9:** UV absorption spectra of compounds **3a**, **3q**, **3u** in 10 mM phosphate buffer at pH 7.0 with 10 mM NaCl and 1 % DMSO at 25<sup>0</sup> C.

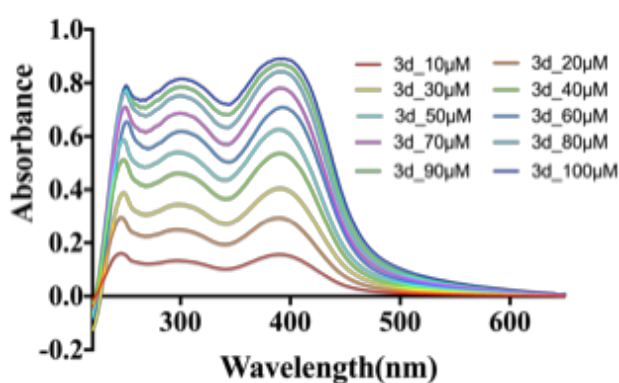

**Supporting Figure S10:** UV absorption spectra of compound **3d** (in 10 mM phosphate buffer at pH 7.0 with 10 mM NaCl and 1 % DMSO at 25<sup>0</sup> C) with an increasing concentration (10 μM to 100 μM).

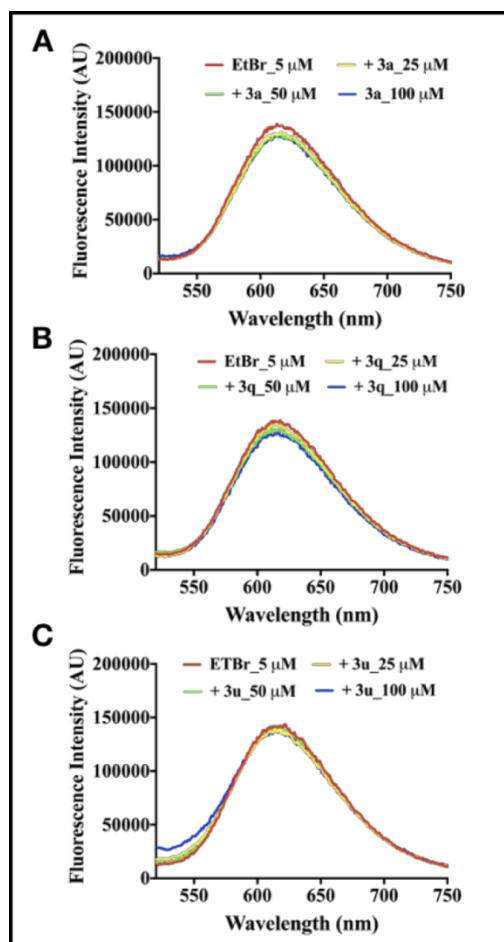

**Supporting Figure S11:** EtBr fluorescence quenching studies for compounds (A) **3a**, (B) **3q** and (C) **3u** in the presence of EtBr only in buffer (10 mM Na-P pH 7, 10 mM NaCl and 1 % DMSO)



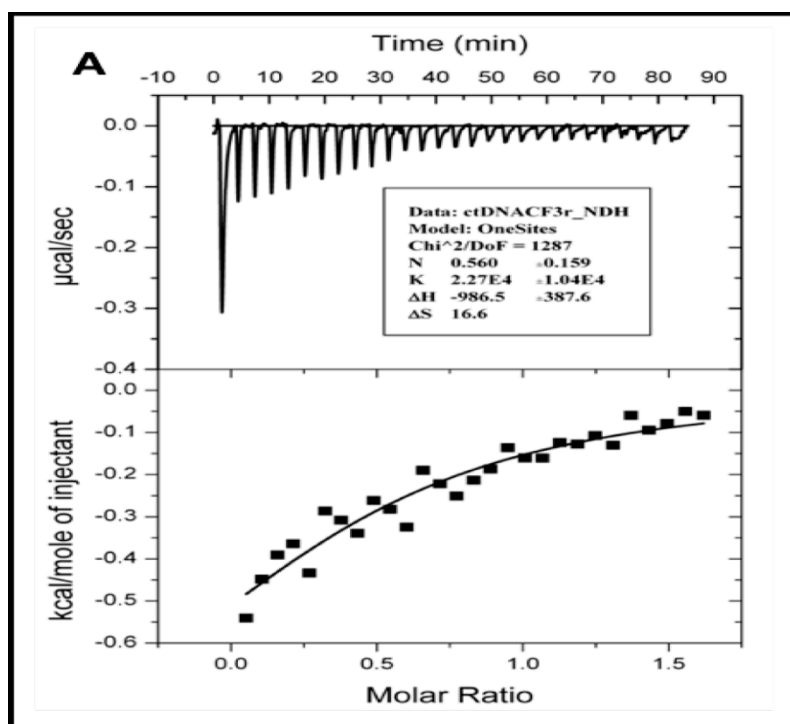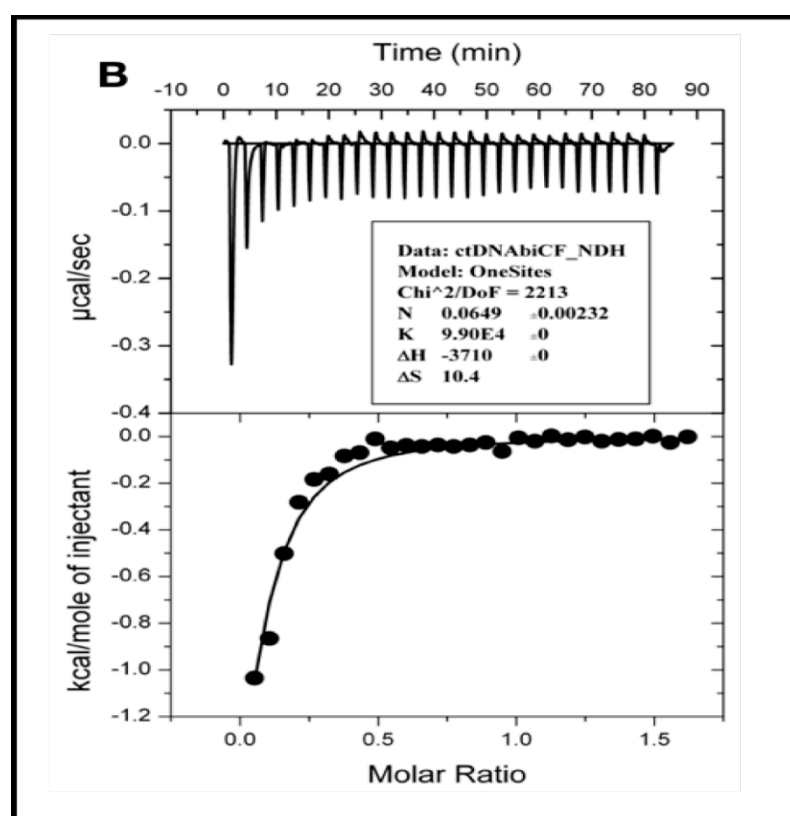

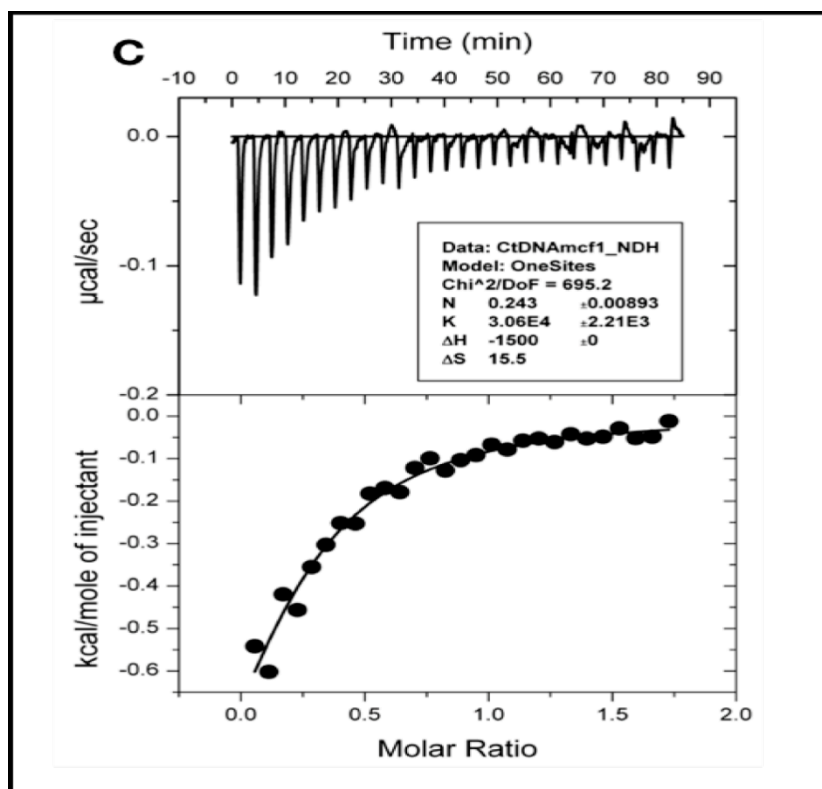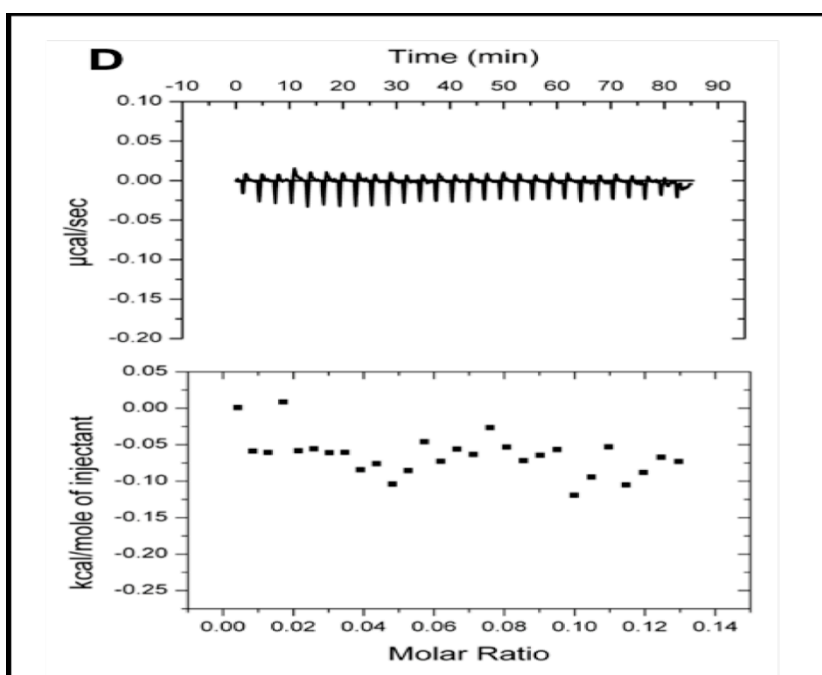

**Supporting Figure S12:** Isothermal titration calorimetric analysis of CT-DNA with (A) **3a**, (B) **3u**, (C) **3q** and (D) Buffer correction. Plots were drawn using Origin 7 software.<sup>5</sup>

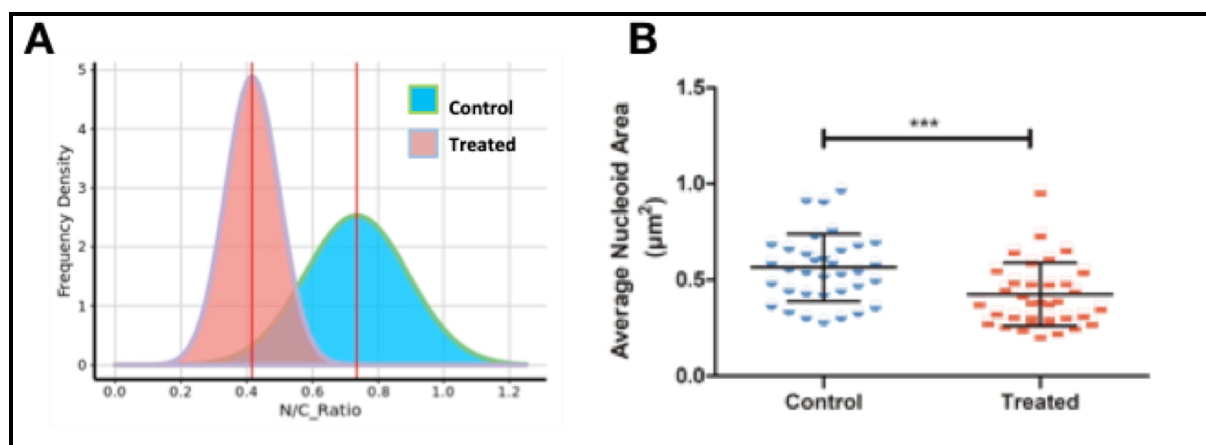

**Supporting Figure S13:** (A) Frequency density plot shows significantly different distribution for untreated and treated *S. aureus* cells with **3a** (control mean N/C = 0.73, treated mean N/C = 0.41). (B) Average nucleoid area also shows significant reduction in treated (0.423) *S. aureus* cells compared to control (0.56). (n=35).

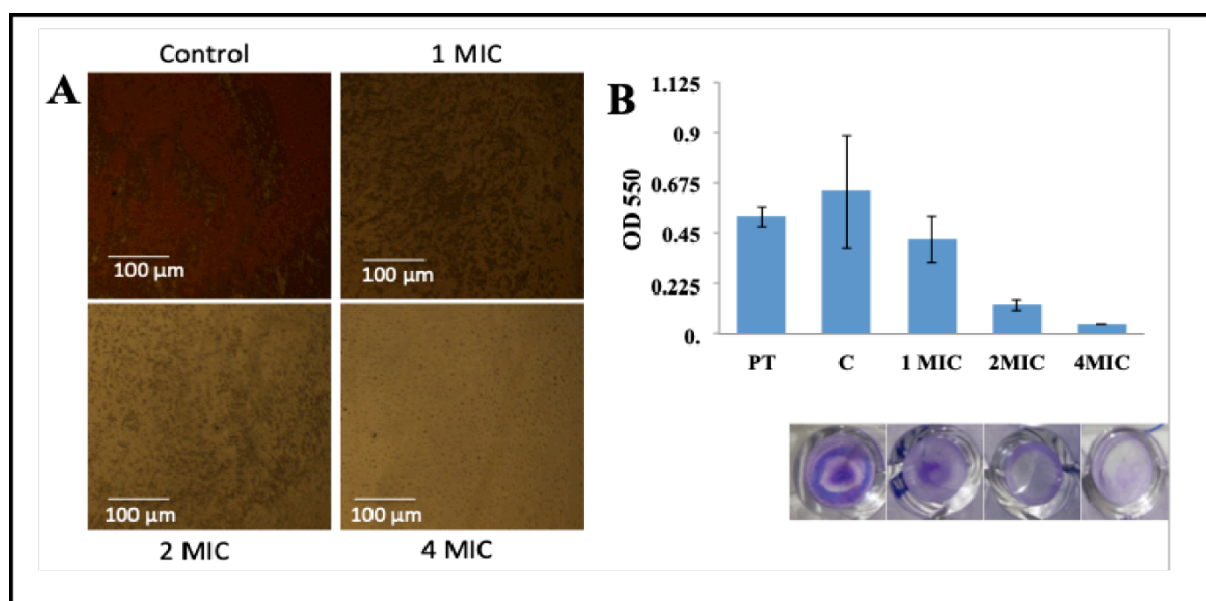

**Supporting Figure S14:** Disruption of preformed biofilm of *S. epidermidis* by **3a**. (A) Visualization of compound **3a** treated (1, 2, 4 MIC) or untreated *S. epidermidis* biofilm under light microscope at 20 $\times$ . (B) Quantification and visualization of biofilm formation in bacteria using crystal violet stain.<sup>6</sup>

**Supporting Table 1:** Comparison Table of our synthetic derivatives with already available analogues.

| Sl. No. | Synthetic compounds/natural products                                                          | MIC (µg/mL)            |                       |                        |                      |
|---------|-----------------------------------------------------------------------------------------------|------------------------|-----------------------|------------------------|----------------------|
|         |                                                                                               | Gram positive bacteria |                       | Gram negative bacteria |                      |
|         |                                                                                               | <i>S. aureus</i>       | <i>S. epidermidis</i> | <i>E. coli</i>         | <i>P. aeruginosa</i> |
| 1.      | 3a                                                                                            | 1.79                   | 2.24                  | 3.36                   | 6.73                 |
| 2.      | 3b                                                                                            | 3.78                   | 3.78                  | 3.78                   | >10.07               |
| 3.      | 3c                                                                                            | 3.47                   | 3.47                  | 2.31                   | >9.24                |
| 4.      | 3f                                                                                            | 3.03                   | 4.32                  | 4.32                   | 10.80                |
| 5.      | 3h                                                                                            | 3.45                   | 3.45                  | 4.59                   | >11.48               |
| 6.      | 3m                                                                                            | 3.36                   | 2.24                  | >22.42                 | >22.42               |
| 7.      | 3q                                                                                            | 0.89                   | 0.89                  | >8.96                  | >6.72                |
| 8.      | 3s                                                                                            | 1.69                   | 0.96                  | 7.24                   | >7.24                |
| 9.      | 3t                                                                                            | 0.93                   | 1.63                  | >9.33                  | >6.99                |
| 10.     | 3u                                                                                            | 1.03                   | 0.52                  | >7.75                  | >7.75                |
| 11.     | 3-(5-Hexyl-3-phenylimidazo[1,5-a]quinoxalin-4-on-1-yl)-1-nonylpyridinium iodide. <sup>7</sup> | 0.78                   | —                     | >500                   | >500                 |
| 12.     | 2,3-Bis(bromomethyl)-6-(trifluoromethyl)quinoxaline. <sup>8</sup>                             | 12.5                   | —                     | >100                   | >100                 |
| 13.     | N-(2,3-di(furan-2-yl)quinoxalin-6-yl)-4-Nitrobenzenesulfonamide. <sup>9</sup>                 | 15                     | —                     | 25                     | 30                   |
| 14.     | Choles-5-en-3[thiazolo [4,5-b]quinoxaline-2-ylhydrazone. <sup>1</sup>                         | 0.78                   | —                     | 0.39                   | —                    |
| 15.     | 4-tert-Butyl-3-hydroxy-1,4-dihydrobenzo[g]quinoxaline-5,10-dione. <sup>11</sup>               | 12.5                   | —                     | 12.5                   | 12.5                 |
| 16.     | Echinomycin (quinomycin A). <sup>1</sup>                                                      | 0.03125                | —                     | 25                     | >100                 |
| 17.     | Triostin A. <sup>1</sup>                                                                      | 0.625                  | —                     | >100                   | >100                 |

## REFERENCE:

1. Cornish, A.; Fox, K. R.; Waring, M. J. Preparation and DNA-binding properties of substituted triostin antibiotics. *Antimicrob. Agents Chemother.* **1983**, *23*, 221-231.
2. Zhao, Y.; Tian, Y.; Cui, Y.; Liu, W.; Ma, W.; Jiang, X. Small molecule-capped gold nanoparticles as potent antibacterial agents that target gram-negative bacteria. *J. Am. Chem. Soc.* **2010**, *132*, 12349–12356.
3. Niu, Y.; Wang, M.; Cao, Y.; Nimmagadda, A.; Hu, J.; Wu, Y.; Cai, J.; Ye, X. Rational design of dimeric lysine N-alkylamides as potent and broad-spectrum antibacterial agents. *J. Med. Chem.* **2018**, *61*, 2865–2874.
4. Mahata, T.; Kanungo, A.; Ganguly, S.; Modugula, E. K.; Choudhury, S.; Pal, S. K.; Basu, G.; Dutta, S. The benzyl moiety in a quinoxaline-based scaffold acts as a DNA intercalation switch. *Angew. Chem. Int. Ed.* **2016**, *128*, 7864-7867.
5. Kwasny, S. M.; Opperman, T. J. Static biofilm cultures of gram-positive pathogens grown in a microtiter format used for anti-biofilm drug discovery. *Curr. prot. pharmacol.* **2010**, *50*, 13A.8.1-13A.8.23.
6. Buurma, N. J.; Haq, I. Advances in the analysis of isothermal titration calorimetry data for ligand–DNA interactions. *Methods.* **2007**, *42*, 162-172.
7. Kalinin, A. A.; Voloshina, A. D.; Kulik, N. V.; Zobov, V. V.; Mamedov, V. A. Antimicrobial activity of imidazo[1,5-a]quinoxaline derivatives with pyridinium moiety. *Eur. J. Med. Chem.* **2013**, *66*, 345-354.
8. Ishikawa, H.; Sugiyama, T.; Kurita, K.; Yokoyama, A. Synthesis and antimicrobial activity of 2,3-bis(bromomethyl)quinoxaline derivatives. *Bioorg. Chem.* **2012**, *41*, 1-5.
9. Kamal, A.; Babu, K. S.; Faazil, S.; Hussaini, S. A.; Shaik, A. B. L-Proline mediated synthesis of quinoxalines; evaluation of cytotoxic and antimicrobial activity. *RSC Adv.* **2014**, *4*, 46369-46377.

10. Khan, S. A. Synthesis, characterization and *in vitro* antibacterial activity of new steroidal 5-en-3-oxazolo and thiazoloquinoxaline. *Eur. J. Med. Chem.* **2008**, *43*, 2040- 2044.
11. Tandon, V. K.; Yadav, D. B.; Maurya, H. K.; Chaturvedi, A. K.; Shukla, P. K. Design, synthesis, and biological evaluation of 1,2,3-trisubstituted-1,4-dihydrobenzo[g]quinoxaline-5,10-diones and related compounds as antifungal and antibacterial agents. *Bioorg. Med. Chem.* **2006**, *14*, 6120- 6126.
-
